# Supplementary material for: Cryo-EM reveals the structural basis of microtubule depolymerization by kinesin-13s
Source: PubMed Central journal article supplement (PMC5916938; doi:10.1038/s41467-018-04044-8), 2018-04-25
Supplement: 41467_2018_4044_MOESM1_ESM.pdf [file 41467_2018_4044_MOESM1_ESM.pdf]

# **Cryo-EM reveals the structural basis of microtubule depolymerization by**

## **Kinesin-13s**

Matthieu, P.M.H. Benoit<sup>1</sup>, Ana B. Asenjo<sup>1</sup> and Hernando Sosa<sup>1</sup>

<sup>1</sup> Department of Physiology and Biophysics, Albert Einstein College of Medicine, Bronx, New York

**Supplementary Figures**

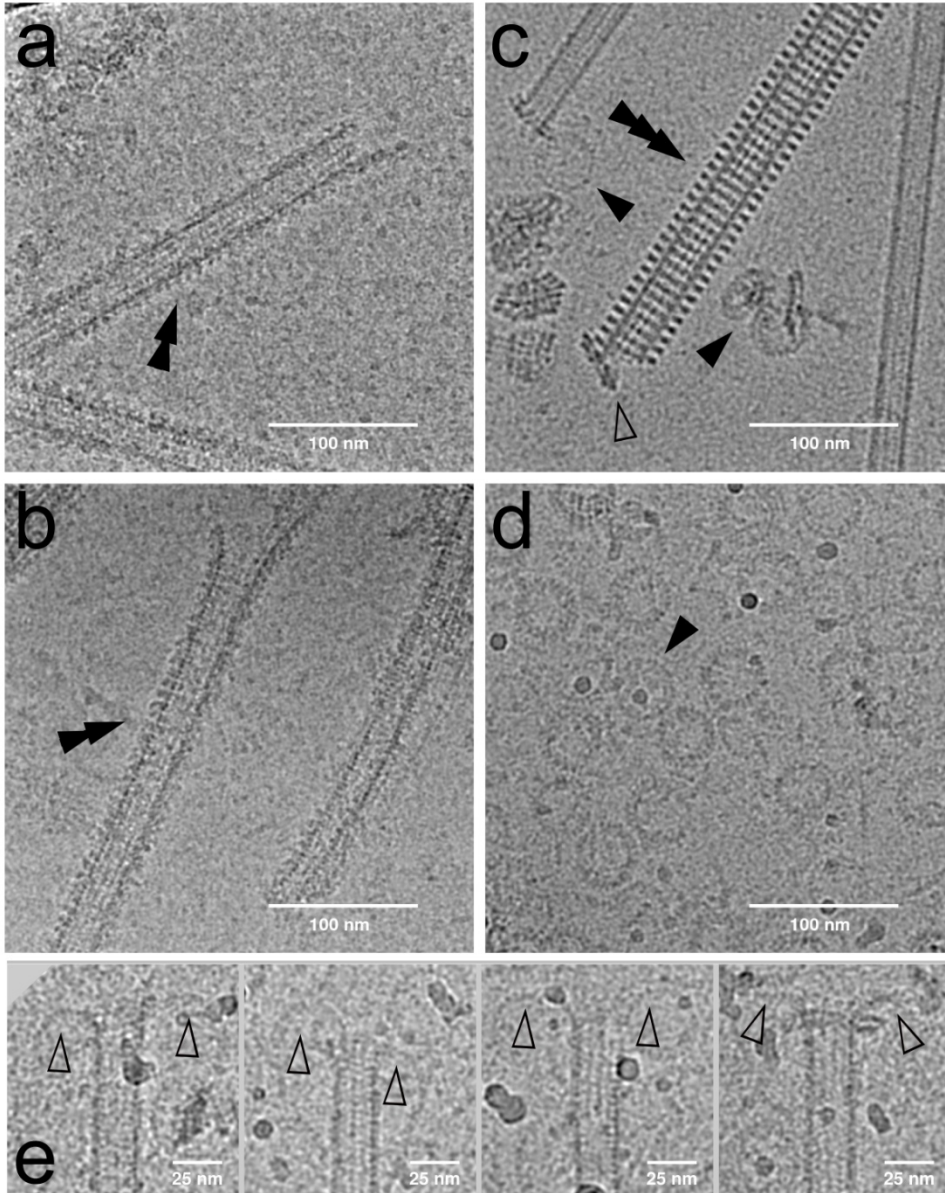

**Supplementary Fig. 1. Cryo-electron micrographs.** Examples of cryo-EM images (average of motion corrected movie frames). Each image corresponds to the experimental conditions used to obtain particular datasets: **a** NMMT<sub>apo</sub> complex. **b** NMMT<sub>AMP-PNP</sub> complex. **c** CTMMT<sub>AMP-PNP</sub> complex. **d** CTNM<sub>AMP-PNP</sub> complex. **e** Curved protofilaments at microtubule ends induced by the NM KLP10A construct in the presence of AMP-PNP. Double arrows in (a) and (b) show examples of microtubules with KLP10A decorated lattice. Single arrows in (c) and (d) show examples of curved-tubulin- protofilaments-KLP10A complexes. The triple arrow in (c) shows a microtubule wrapped around with curved-tubulin-KLP10A complex spirals. The open arrow in (c) and (e) shows curved protofilaments peeling away from the microtubule.

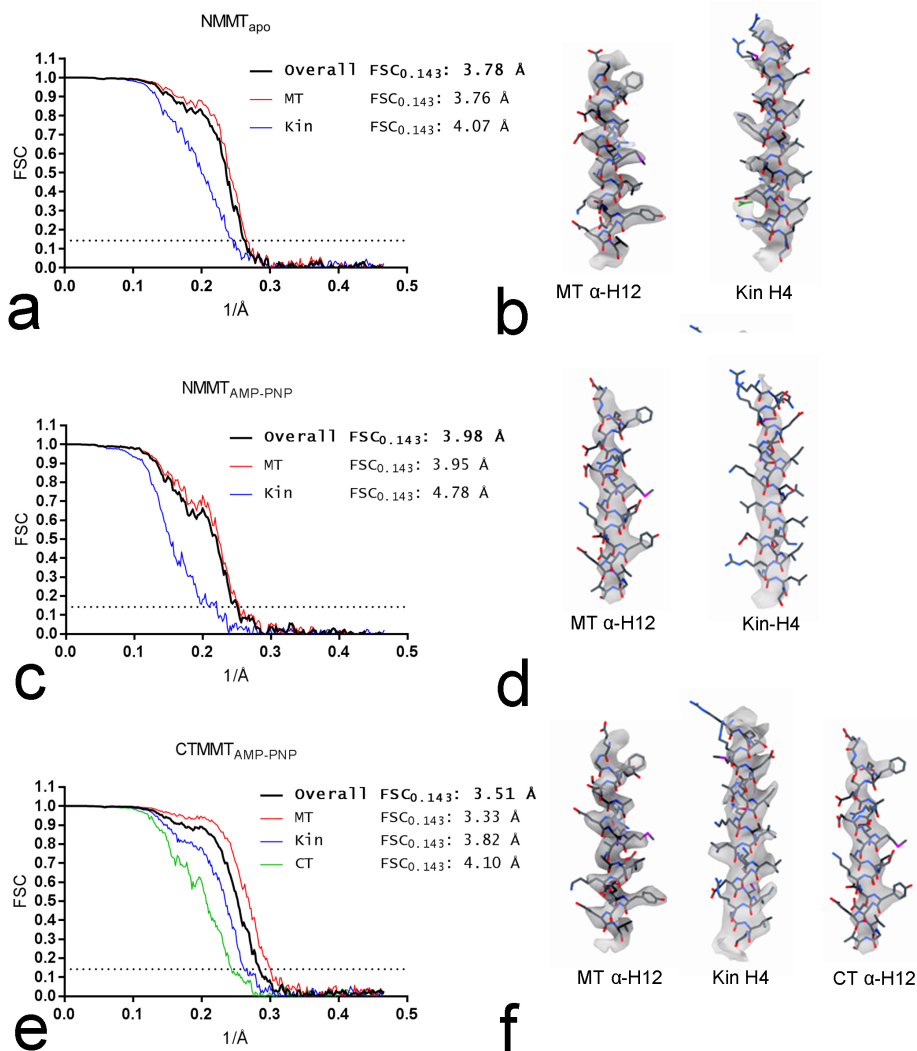

**Supplementary Fig. 2 Resolution estimates.** Gold standard Fourier shell correlation (FSC) of the 3D reconstructions (left) and examples of the electron densities and corresponding atomic models of some  $\alpha$ -helices in the complexes (right). **a-b** NMMT<sub>apo</sub>. **c-d** NMMT<sub>AMP-PNP</sub>. **e-f** CTMMT<sub>AMP-PNP</sub>. FSC curves corresponding to the whole complex (overall) or distinct parts of the map (MT: microtubule, Kin: KLP10A, CT: curved tubulin) are shown in different colors as indicated. The FSC<sub>0.143</sub> level is indicated by the dotted line.

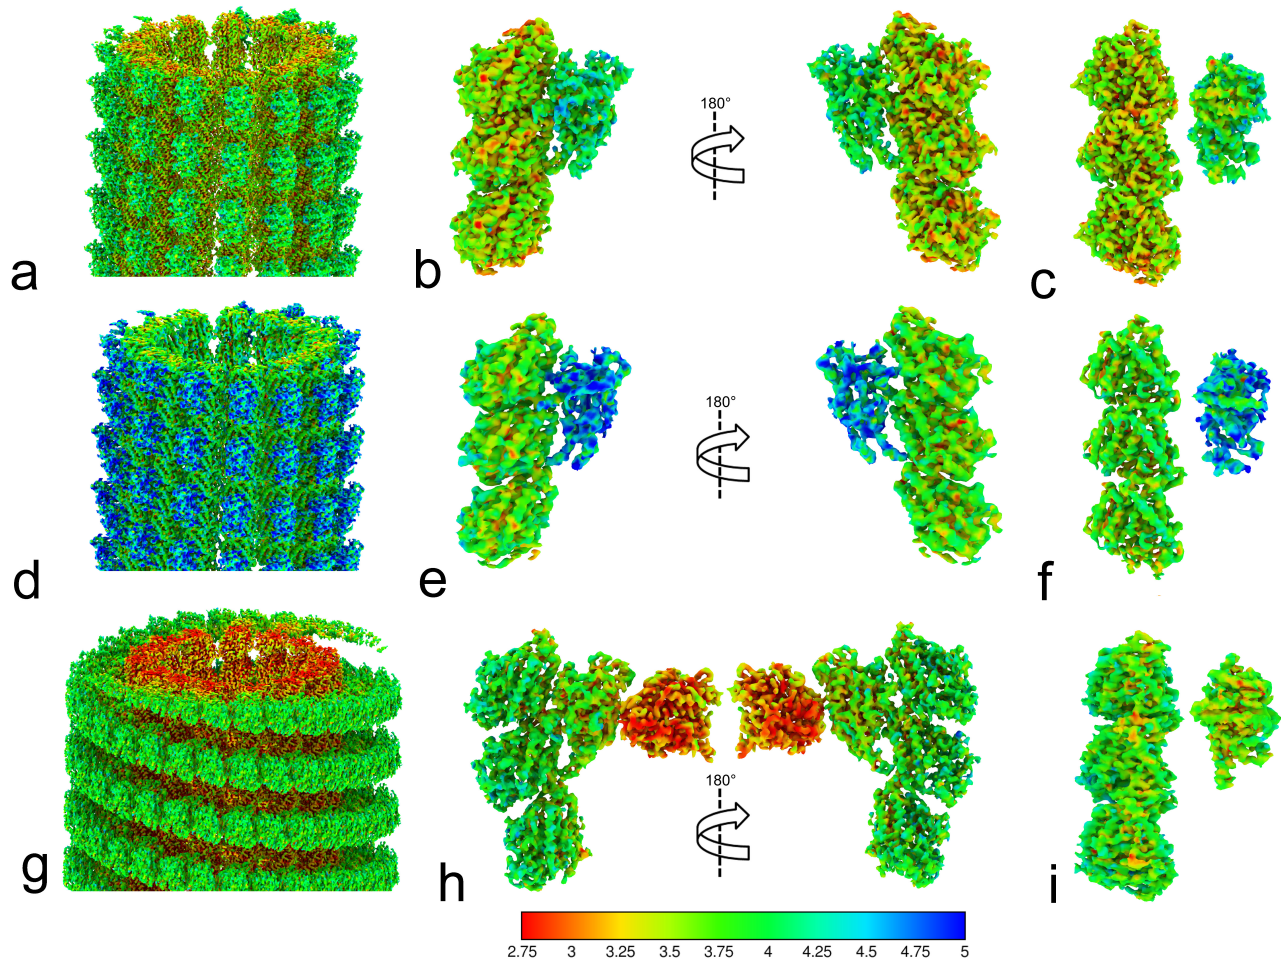

**Supplementary Fig. 3 Local resolution maps.** **a-c**  $\text{NMMT}_{\text{apo}}$ . **d-f**  $\text{NMMT}_{\text{AMP-PNP}}$ . **g-i**  $\text{CTMMT}_{\text{AMP-PNP}}$ . Each rows shows: the whole map (left, (a), (d) and (g)); an asymmetric unit with an extra  $\beta$ -tubulin subunit in two orientations (middle, (b), (e) and (h)); an asymmetric unit with an extra  $\beta$ -tubulin subunit showing the interface between KLP10A and tubulin (right, (c), (f), and (i)). Local resolution was estimated using Bsoft (see Methods). Resolution color scale values in  $\text{\AA}$ .



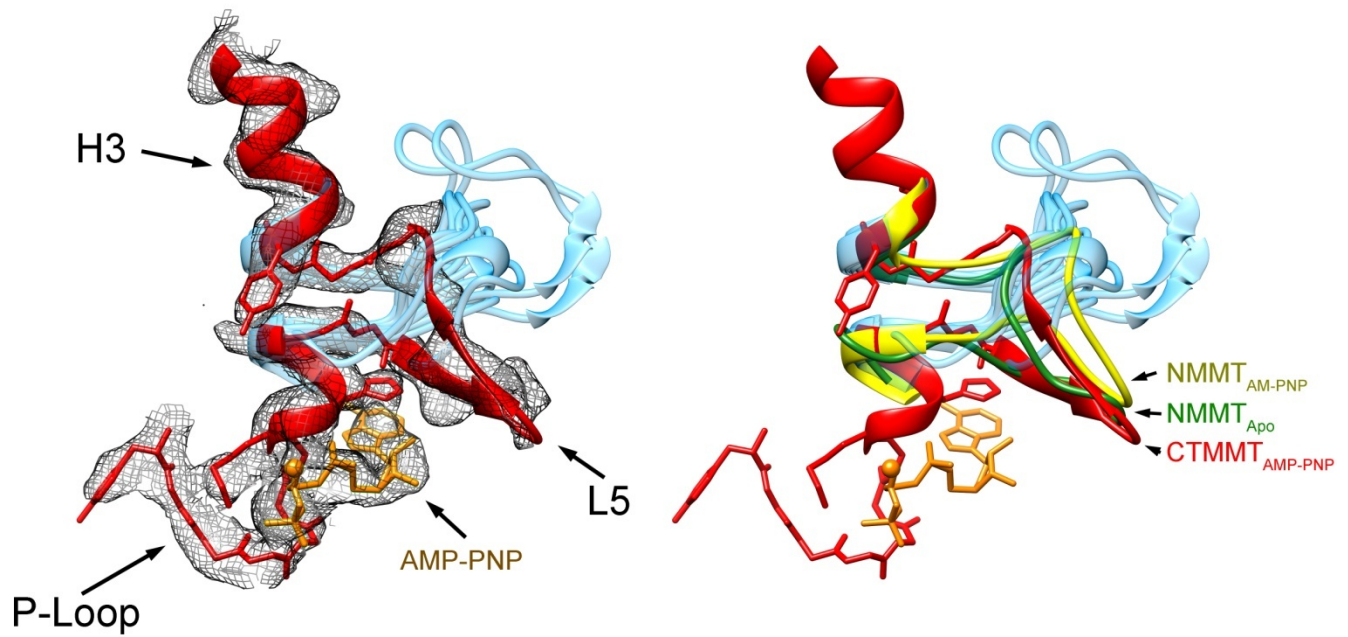

**Supplementary Fig. 4 Structure of the KLP10A loop-5.** The mesh shows the electron density in the helix-3 (H3) loop-5 (L5) region of the CTMMT<sub>AMP-PNP</sub> complex with the corresponding atomic model in red and the AMP-PNP molecule in orange. The structure of the L5 of other kinesins motor domains, after aligning the corresponding H3 and P-loop regions, are shown in light blue (PDB accession codes: 1BG2, 4HNA , 4LNU, 1MKJ , 5LT0, 5LT1, 5LT2, 5LT3, 5LT4, 3J8X, 3J8Y, 1VFW, 4OZQ, 3ZFD, 3HQD , 1Q0B, 5X3E, 3LRE , 1RY6, 2NCD). The position and orientation of L5 in the NMMT complexes are relatively similar to the one of the CTMMT<sub>AMP-PNP</sub> complex (right panel).

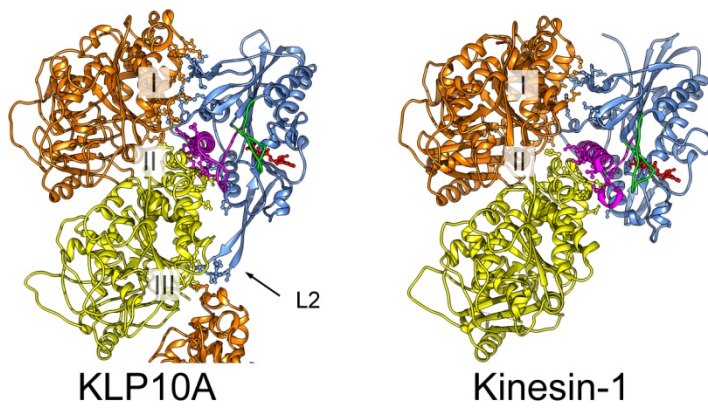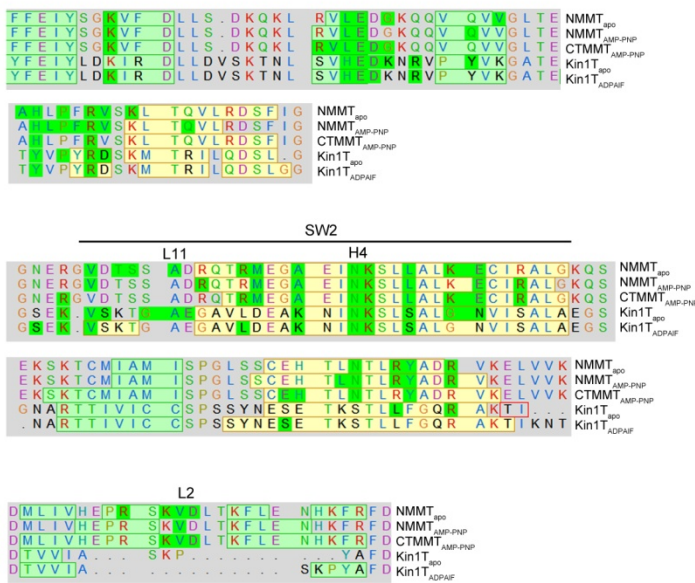

**Supplementary Fig. 5 Kinesin-tubulin interactions.** The top left panel: side view of the KLP10A CTMMT<sub>AMP-PNP</sub> complex (this work). Top right panel: side view of a kinesin-1 tubulin complex (4HNA). Kinesin-Tubulin interacting areas are divided in three regions (I, II III). Note the similarity between areas I and II between KLP10A and kinesin-1. On the other hand Kinesin-1 lacks the kinesin-13 specific long loop-2 (L2) and therefore does not interact with the tubulin inter-dimer interface (area III). Bottom panel: sequence alignment in the three kinesin-tubulin interacting regions. Kinesin residues with atoms close enough to make contacts with tubulin in the complex structures (as determined with UCSF-Chimera: find contacts utility) are highlighted in bright green. From top to bottom the kinesin sequences in each panel correspond to: KLP10A in the NMMT<sub>apo</sub>, NMMT<sub>AMP-PNP</sub> and CTMMT<sub>AMP-PNP</sub> complexes, Kinesin-1-tubulin complexes in the apo form (4LNU) and in the presence of ADPAIF<sub>4</sub> (4HNA). Note that tubulin in the two kinesin-1 tubulin complex structures is in the curved form, so it is possible that some of the kinesin-1 mapped interactions may be different when binding to the microtubule lattice.

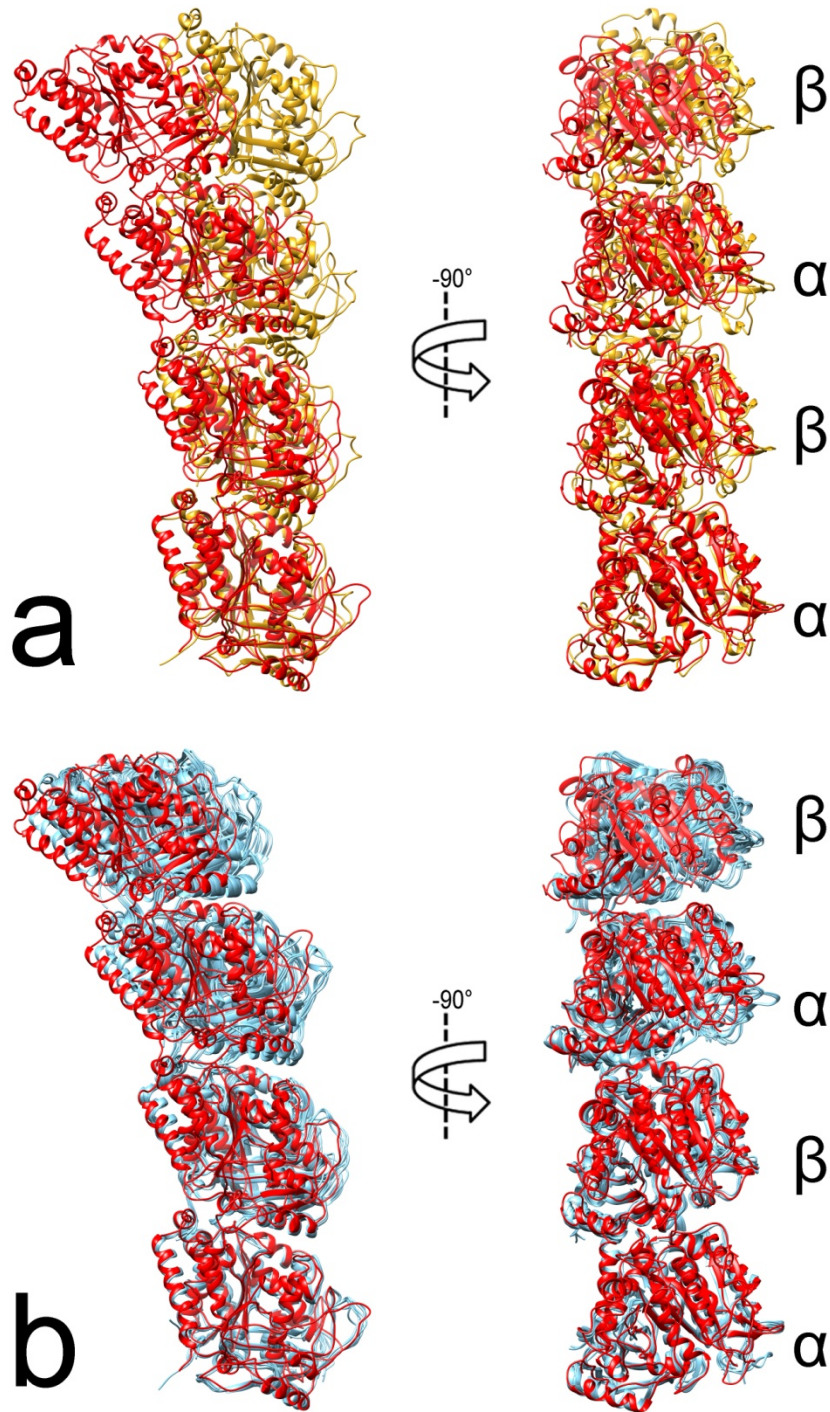

**Supplementary Fig. 6 Comparison between tubulin protofilament structures. a** Tubulin protofilament in the CTMMT<sub>AMP-PNP</sub> complex (red) vs. the straight tubulin in the microtubule of the same complex (yellow). **b** Tubulin protofilament in the CTMMT<sub>AMP-PNP</sub> complex (red) vs. several superimposed crystal structures of curved tubulin protofilaments (cyan, PDB accession codes: 1SA0, 3RYF, 3RYH, 3RYI, 3RYC, 4I4T, 4I55, 4IHJ). All structures aligned by their bottom  $\alpha$ -tubulin structure.



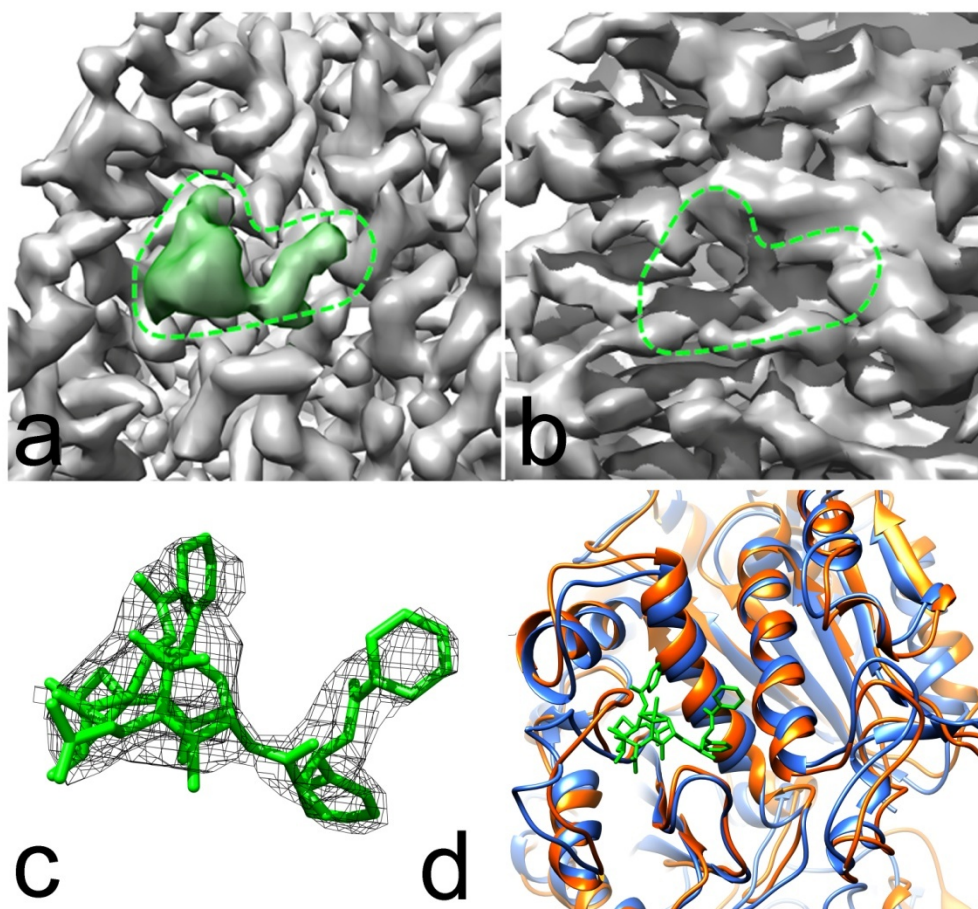

**Supplementary Fig. 7 Paclitaxel binding site.** **a** Cryo-EM density (iso-surface representation) near the paclitaxel (Taxol<sup>®</sup>) binding site in the  $\beta$ -tubulin subunit of the microtubule in the CTMMT<sub>AMP-PNP</sub> complex. The density corresponding to the paclitaxel molecule is colored green. The paclitaxel molecule with associated density is shown in (c). **b** Cryo-EM density near the paclitaxel binding site in the  $\beta$ -tubulin subunit of the curved tubulin (CT) in the CTMMT<sub>AMP-PNP</sub> complex. Despite the maps having different resolution in this area (Supplementary Figs. 2 and 3) a distinct cavity can be observed in (b) in the place that is occupied by paclitaxel in (a) (dotted green outline). **c** Paclitaxel molecule (green) and associated cryo-EM density (dark mesh) in the  $\beta$ -tubulin subunit of the microtubule in the CTMMT<sub>AMP-PNP</sub> complex. **d** Comparison of the two  $\beta$ -tubulin models in the CTMMT<sub>AMP-PNP</sub> complex. The microtubule  $\beta$ -tubulin is shown in blue with paclitaxel molecule in green. The curved tubulin protofilament  $\beta$ -tubulin is shown in orange.



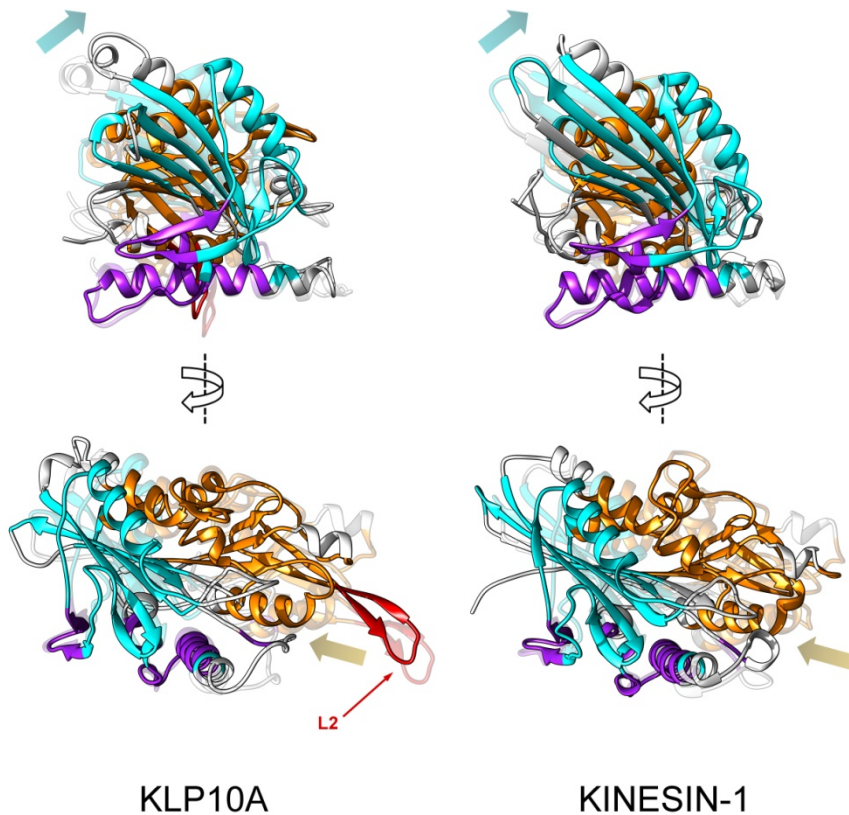

**Supplementary Fig. 8 Kinesin motor domain movements associated with nucleotide pocket closure.** Conformational changes in kinesin-1 associated with binding of ATP analogues have been described as relative movements between three sub-domains (Cao et al., 2014), a 'P-loop' sub-domain (colored orange), a 'Switch I/II' sub-domain (colored cyan) and a 'tubulin binding' sub-domain (colored magenta). The left panel shows the KLP10A motor-domain of the CTMMT<sub>AMP-PNP</sub> complex (100% opacity) superimposed with the one of the NMMT<sub>apo</sub> complex (30% opacity). The right panel shows the kinesin-1 motor-domain of the KIF5B-ADPALF<sub>4</sub>-tubulin complex (4HNA, 100% opacity) superimposed with the one of the KIF5B-*apo*-tubulin complex (4LNU, 30% opacity). Sequence aligned regions of KLP10 and KIF5B are colored the same. Superimposed structures are aligned by their 'tubulin binding' sub-domains. Note that similar sub-domains movements occur in KLP10A and kinesin-1 going from the apo (and open nucleotide pocket) form to the ATP-analogue-bound (and closed nucleotide pocket) form. This includes a rotation of H4 relative to the rest of the motor domain, first detected in medium resolution cryo-EM structures of kinesin microtubule complexes<sup>38</sup>. H4 is part of the 'tubulin binding' sub-domain colored magenta in this Figure. The rotation of H4 relative to the rest of the KLP10A motor domain can also be seen clearly in Figs. 2(d)-(f). In the case of KLP10A the kinesin-13 family-specific loop-2 (red), which is connected to the 'P-loop sub-domain', moves relative to the 'tubulin-binding' sub-domain. This movement induces a tubulin conformational change because loop-2 stays bound to tubulin (Figs. 2 and 3, Supplemental Fig. 9).

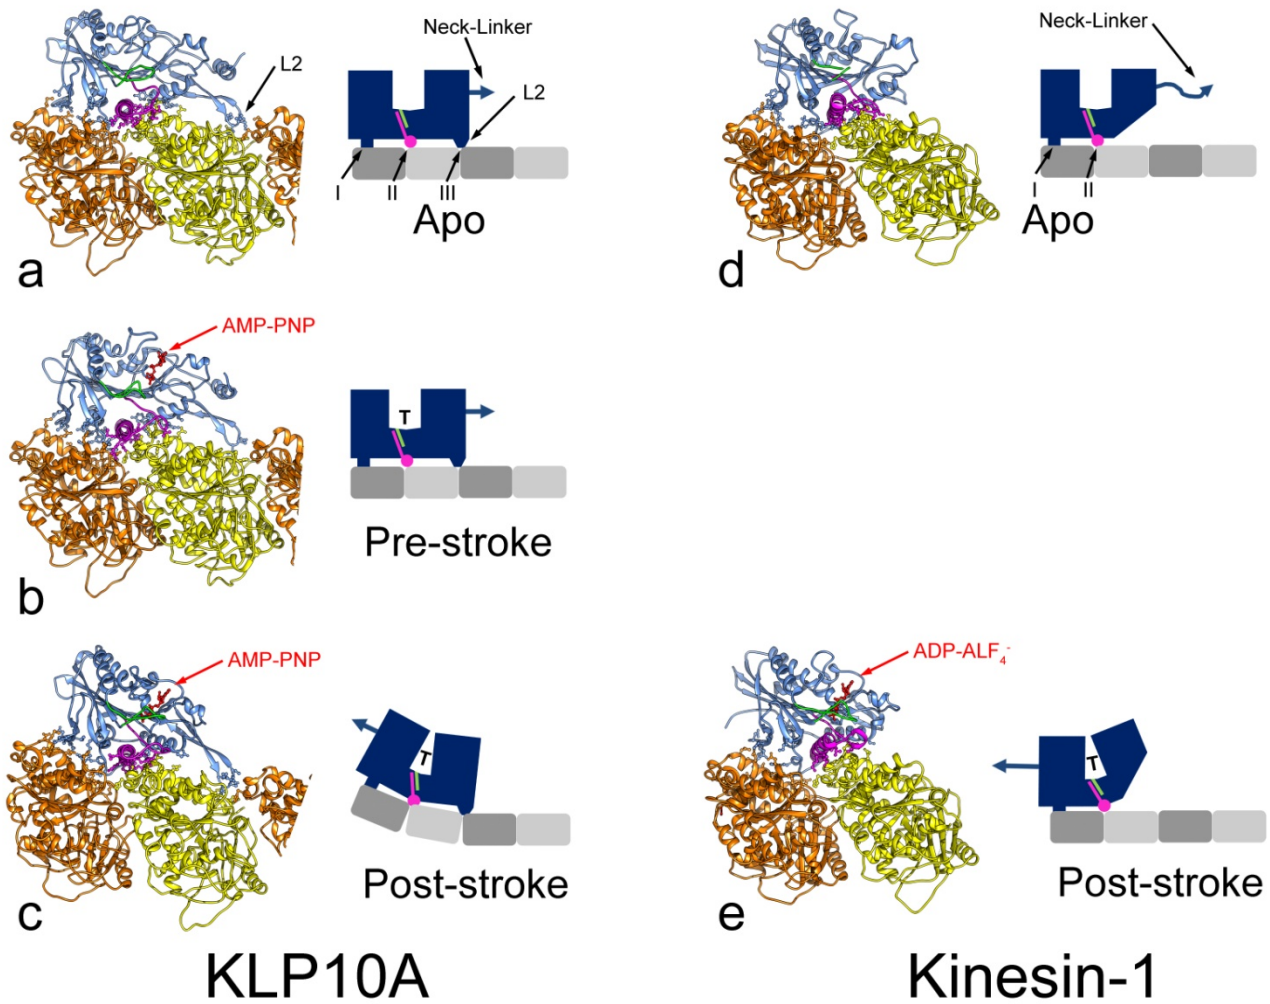

**Supplementary Fig. 9. Conserved kinesin ATPase related conformational changes adapted for microtubule depolymerization or unidirectional movement.** Atomic models (left) and cartoon interpretation of the structures (right). **a** KLP10A NMMT<sub>apo</sub> complex. **b** KLP10A NMMT<sub>AMP-PNP</sub> complex. **c** KLP10A CTMMT<sub>AMP-PNP</sub> complex. **d** Kinesin-1 (KIF5B) tubulin complex in the apo form (4LNU). **e** Kinesin-1 (KIF5B) tubulin complex with ADPAIF<sub>4</sub> (4HNA).
